# Supplementary material for: Genome-Wide Identification and Characterization of CPR5 Genes in Gossypium Reveals Their Potential Role in Trichome Development
Source: Front Genet. 2022 Jun 8;13:921096. doi: 10.3389/fgene.2022.921096 (PMC9213653; doi:10.3389/fgene.2022.921096)
Supplement: Supplementary file 4 [file Table1.XLSX]

## Sheet: Sheet1
Supplementary Table 1. Basic information of CPR5 genes in Gossypium species
Gene name	Gene ID	CDS sequence length	Protein sequnce length	PI	Molecular Weight (kDa)	Instability index	Subcellur location	Gravy
GheCPR5.1	Ghe02G17590	1683	560	8.78	62787.4	51.79	Plasma Membrane	-0.069
GarCPR5.1	Gar02G16100	1683	560	8.81	62878.5	50.22	Plasma Membrane	-0.096
GhirCPR5.1	Ghir_A02G014890.1	1683	560	8.73	62733.3	51.47	Plasma Membrane	-0.076
GhirCPR5.2	Ghir_D03G004590.1	1683	560	9.01	62882.6	50.06	Plasma Membrane	-0.101
GhirCPR5.3	Ghir_D03G004590.2	1206	401	9.21	44756.9	53.70	Nuclear	-0.434
GbarCPR5.1	Gbar_A02G014620.1	1683	560	8.68	62715.4	49.18	Plasma Membrane	-0.060
GbarCPR5.2	Gbar_A02G014620.2	1206	401	8.79	44621.8	51.25	Nuclear	-0.367
GbarCPR5.3	Gbar_A02G014620.3	1503	500	8.78	55845.7	47.96	Nuclear, Plasma Membrane	-0.293
GbarCPR5.4	Gbar_D03G004470.1	1683	560	9.01	62983.6	49.92	Plasma Membrane	-0.102
GtomCPR5.1	TYH79266.1	1683	560	9.01	62934.7	49.99	Plasma Membrane	-0.089
GtomCPR5.2	TYI40446.1	1683	560	8.73	62747.3	52.08	Plasma Membrane	-0.075
GmusCPR5.1	TYI89344.1	1683	560	9.01	62938.6	49.92	Plasma Membrane	-0.102
GmusCPR5.2	TYJ46904.1	1683	560	8.73	62793.4	49.76	Plasma Membrane	-0.069
GmusCPR5.3	TYJ46905.1	1230	409	8.76	45417.6	51.34	Nuclear	-0.400
GdarCPR5.1	TYH28674.1	1683	560	8.81	62752.4	50.31	Plasma Membrane	-0.078
GdarCPR5.2	TYG75696.1	1683	560	9.01	62938.6	49.92	Plasma Membrane	-0.102
GdarCPR5.3	TYG75697.1	1503	500	9.10	56036.8	49.33	Nuclear, Plasma Membrane	-0.348
GanoCPR5.1	GanoB102G20860	1680	559	8.75	62611	49.42	Plasma Membrane	-0.104
GstuCPR5.1	GstuC102G19260	1683	560	8.65	62854.3	49.04	Plasma Membrane	-0.102
GrotCPR5.1	GrotK202G29940	1677	558	8.74	62750.4	50.68	Plasma Membrane	-0.070
GthuCPR5.1	Gthu48203	1833	610	9.26	68467.08	48.83	Plasma Membrane	-0.089
GraiCPR5.1	D5.v1.pred_00039104-RA	1683	560	9.01	62951.7	51.74	Plasma Membrane	-0.089
GstoCPR5.1	GstoE102G21370	1674	557	9.12	62508.2	47.47	Plasma Membrane	-0.075
GlonCPR5.1	Golon.002G051700-1	1683	560	8.74	62678.2	49.78	Plasma Membrane	-0.096
GlonCPR5.2	Golon.002G051700-2	807	268	8.56	30379.1	37.26	Plasma Membrane	0.428
GausCPR5.1	KAA3457341.1	1683	560	8.71	62910.4	49.58	Plasma Membrane	-0.089
